# Supplementary material for: Long Noncoding RNA lncCAMTA1 Promotes Proliferation and Cancer Stem Cell-Like Properties of Liver Cancer by Inhibiting CAMTA1
Source: MDPI journal article supplement (doi:10.3390/ijms17101617), 2016-09-23
Supplement: s1 [file s1]

# Supplementary Materials: Long Noncoding RNA lncCAMTA1 Promotes Proliferation and Cancer Stem Cell-Like Properties of Liver Cancer by Inhibiting CAMTA1

Li-Juan Ding, Yan Li, Shu-Dong Wang, Xin-Sen Wang, Fang Fang, Wei-Yao Wang, Peng Lv, Dong-Hai Zhao, Feng Wei and Ling Qi

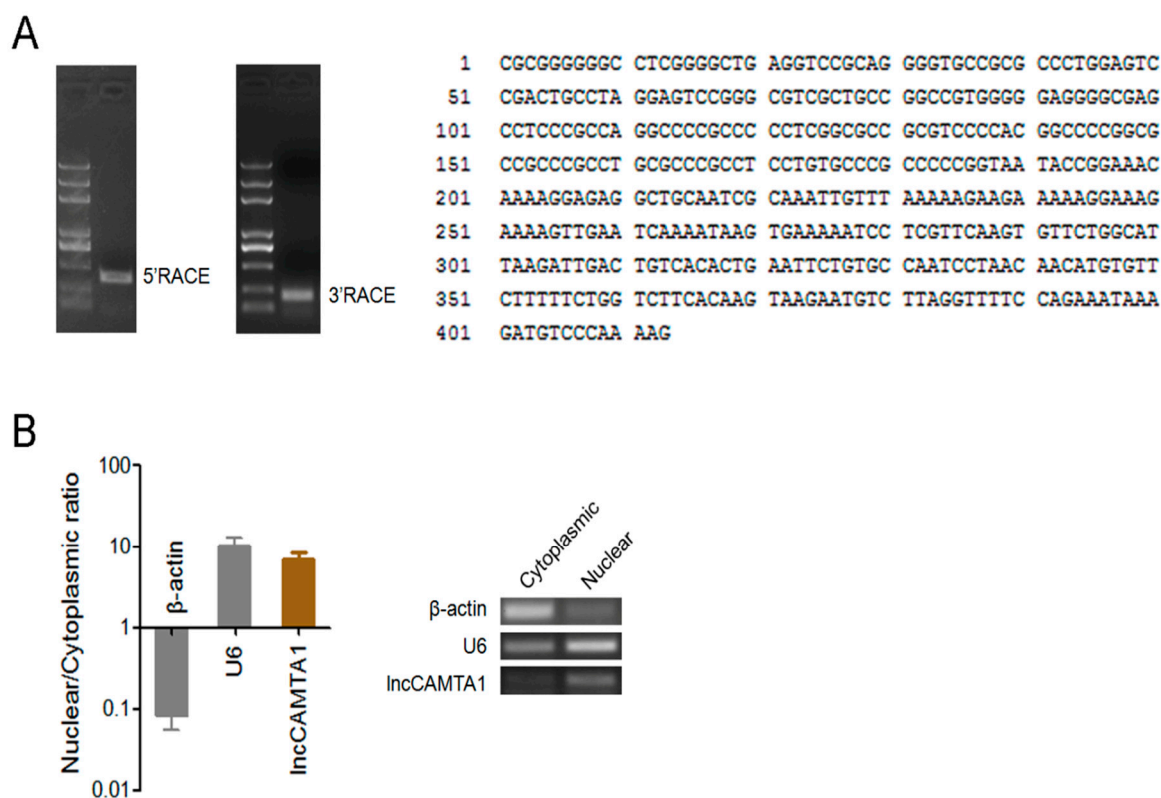

**Figure S1.** Full-length sequences and subcellular localization of lncCAMTA1 in hepatocellular carcinoma cells. **(A)** Full-length nucleotide sequences of lncCAMTA1; **(B)** Quantitative real-time PCR (qRT-PCR) analysis of lncCAMTA1 subcellular location in HCCLM3 cells.  $\beta$ -actin and U6 were used as cytoplasmic and nuclear markers respectively.  $n = 3$ .
